# Supplementary material
Source: Springer Nature journal article supplement (https://www.springermedizin.de/resource/supplementary/12885_2013_4750_MOESM7_ESM.pdf/9467092)

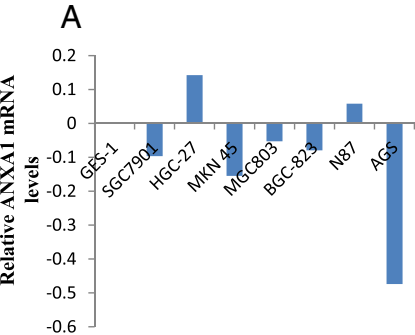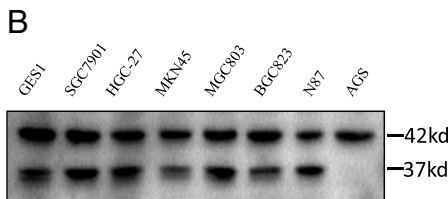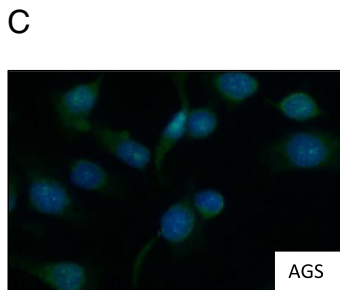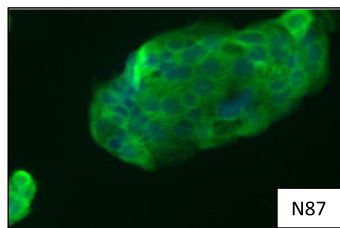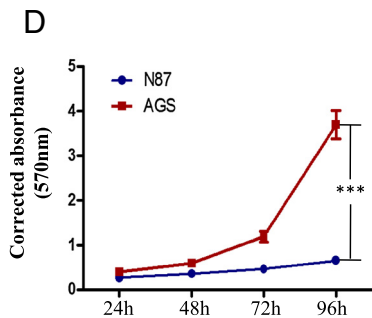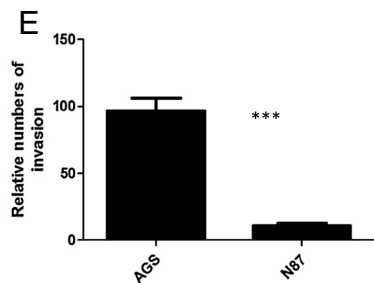

Supplement: MOESM7 [file 9467092]
